# Supplementary material for: Trajectories and Determinants of Physical Activity during COVID-19 Pandemic: A Population-Based Study of Middle-Aged and Elderly Individuals in The Netherlands
Source: MDPI journal article supplement (doi:10.3390/nu13113832), 2021-10-27
Supplement: s1 [file s1]

## SUPPLEMENTARY MATERIAL

### **Trajectories and Determinants of Physical Activity during Covid-19 Pandemic: A Population-Based Study of Middle-Aged and Elderly Individuals in The Netherlands**

Amy Hofman<sup>1</sup>, Marlou A.M. Limpens<sup>1#</sup>, Tosca O.E. Crom<sup>1#</sup>, M. Arfan Ikram<sup>1</sup>,  
Annemarie I. Luik<sup>1,2</sup>, Trudy Voortman<sup>1,3</sup>

# Marlou A.M. Limpens and Tosca O.E. de Crom contributed equally

<sup>1</sup> Department of Epidemiology, Erasmus MC, University Medical Center Rotterdam, Rotterdam, The Netherlands,

<sup>2</sup> Department of Child and Adolescent Psychiatry/Psychology, Erasmus MC University Medical Center Rotterdam, Rotterdam, the Netherlands,

<sup>3</sup> Division of Human Nutrition and Health, Wageningen University & Research, Wageningen, The Netherlands

## Supplementary material

**Supplemental Table S1.** Descriptive information on physical activity of each time point.

|                       | <b>(Moderate-to-Vigorous) Physical Activity during the Past 14 Days</b> |                     |                     |
|-----------------------|-------------------------------------------------------------------------|---------------------|---------------------|
|                       | <b>Time Point 1</b>                                                     | <b>Time Point 2</b> | <b>Time Point 3</b> |
|                       | <b>N(%)</b>                                                             | <b>N(%)</b>         | <b>N(%)</b>         |
| Less than 50 minutes  | 1323 (22.9%)                                                            | 689 (14.2%)         | 545 (11.8%)         |
| 50–100 minutes        | 1234 (21.4%)                                                            | 798 (16.5%)         | 741 (16.0%)         |
| 100–150 minutes       | 877 (15.2%)                                                             | 614 (12.7%)         | 593 (12.8%)         |
| 150–180 minutes       | 670 (11.6%)                                                             | 547 (11.3%)         | 533 (11.5%)         |
| More than 180 minutes | 1673 (29.0%)                                                            | 2190 (45.3%)        | 2211 (47.8%)        |
| Total                 | 5777 (100.0%)                                                           | 4838 (100.0%)       | 4623 (100.0%)       |

Question asked at each time point: “During the past 14 days, how many minutes did you exercise (moderately) intensively in total (walking, cycling, running)?”

**Supplemental Table S2.** Study sample characteristics per latent class trajectory of physical activity.

|                                                        | ‘Steadily High’<br>(N = 1837) | ‘Increaseers’<br>(N = 287) | ‘Steadily<br>Medium’<br>(N = 1277) | ‘Steadily Low’<br>(N = 1590) | ‘Steadily very<br>Low’<br>(N = 786) |
|--------------------------------------------------------|-------------------------------|----------------------------|------------------------------------|------------------------------|-------------------------------------|
|                                                        | Median<br>(IQR)/N(%)          | Median<br>(IQR)/N(%)       | Median<br>(IQR)/N(%)               | Median<br>(IQR)/N(%)         | Median<br>(IQR)/N(%)                |
| <b>Demographics</b>                                    |                               |                            |                                    |                              |                                     |
| Sex (female)                                           | 1006 (54.8%)                  | 154 (53.7%)                | 743 (58.2%)                        | 956 (60.1%)                  | 492 (62.6%)                         |
| Age <i>mean</i> (SD)                                   | 66.6 (10.1)                   | 66.2 (10.5)                | 69.2 (11.3)                        | 71.2 (11.8)                  | 73.9 (12.2)                         |
| Educational level                                      |                               |                            |                                    |                              |                                     |
| Primary                                                | 68 (3.7%)                     | 21 (7.3%)                  | 67 (5.2%)                          | 108 (6.8%)                   | 91 (11.6%)                          |
| Lower                                                  | 503 (27.4%)                   | 71 (24.7%)                 | 435 (34.1%)                        | 570 (35.8%)                  | 325 (41.3%)                         |
| Further/intermediate                                   | 587 (32.0%)                   | 94 (32.8%)                 | 421 (33.0%)                        | 529 (33.3%)                  | 229 (29.1%)                         |
| Higher                                                 | 668 (36.4%)                   | 97 (33.8%)                 | 339 (26.5%)                        | 366 (23.0%)                  | 134 (17.0%)                         |
| Occupational status                                    |                               |                            |                                    |                              |                                     |
| Employed                                               | 645 (35.1%)                   | 101 (35.2%)                | 357 (28.0%)                        | 366 (23.0%)                  | 142 (18.1%)                         |
| Retired                                                | 1015 (55.3%)                  | 147 (51.2%)                | 780 (61.1%)                        | 1012 (63.6%)                 | 521 (66.3%)                         |
| Unemployed                                             | 47 (2.6%)                     | 15 (5.2%)                  | 34 (2.7%)                          | 49 (3.1%)                    | 22 (2.8%)                           |
| <b>Physical health</b>                                 |                               |                            |                                    |                              |                                     |
| Self-perceived health                                  |                               |                            |                                    |                              |                                     |
| Poor/fair                                              | 110 (6.0%)                    | 28 (9.8%)                  | 129 (10.1%)                        | 273 (17.2%)                  | 260 (33.1%)                         |
| Good                                                   | 980 (53.3%)                   | 177 (61.7%)                | 753 (59.0%)                        | 970 (61.0%)                  | 405 (51.5%)                         |
| Very good/excellent                                    | 726 (39.5%)                   | 79 (27.5%)                 | 378 (29.6%)                        | 312 (19.6%)                  | 103 (13.1%)                         |
| <b>Psychosocial health</b>                             |                               |                            |                                    |                              |                                     |
| Depressive symptoms (CES-D)                            | 3.00 (1.00–6.00)              | 4.00 (1.00–8.00)           | 4.00 (2.00–8.00)                   | 5.00 (2.00–8.00)             | 6.00 (3.00–10.00)                   |
| Anxiety symptoms (HADS)                                | 2.00 (1.00–5.00)              | 2.00 (1.00–5.00)           | 3.00 (1.00–5.00)                   | 3.00 (1.00–5.00)             | 4.00 (1.00–6.00)                    |
| Worries about the pandemic (scale 0–10)                | 5.00 (3.00–7.00)              | 5.00 (3.00–7.00)           | 5.00 (3.00–7.00)                   | 5.00 (3.00–7.00)             | 5.00 (3.00–7.00)                    |
| <b>Lifestyle</b>                                       |                               |                            |                                    |                              |                                     |
| Diet compared to prior                                 |                               |                            |                                    |                              |                                     |
| (Much) less healthy                                    | 62 (3.4%)                     | 17 (5.9%)                  | 48 (3.8%)                          | 78 (4.9%)                    | 60 (7.6%)                           |
| As healthy                                             | 1619 (88.1%)                  | 246 (85.7%)                | 1110 (86.9%)                       | 1390 (87.4%)                 | 666 (84.7%)                         |
| (Much) more healthy                                    | 150 (8.2%)                    | 24 (8.4%)                  | 112 (8.8%)                         | 109 (6.9%)                   | 54 (6.9%)                           |
| Smoking                                                | 158 (8.6%)                    | 27 (9.4%)                  | 138 (10.8%)                        | 154 (9.7%)                   | 118 (15.0%)                         |
| Alcohol (glasses/day)                                  | 1.00 (0.00–2.00)              | 1.00 (0.00–2.00)           | 1.00 (0.00–2.00)                   | 1.00 (0.00–1.00)             | 0.00 (0.00–1.00)                    |
| Physical activity (Moderate-to-vigorous, past 14 days) |                               |                            |                                    |                              |                                     |
| Less than 50 minutes                                   | 0 (0.0%)                      | 94 (32.8%)                 | 0 (0.0%)                           | 479 (30.1%)                  | 750 (95.4%)                         |
| 50–100 minutes                                         | 0 (0.0%)                      | 193 (67.2%)                | 143 (11.2%)                        | 862 (54.2%)                  | 36 (4.6%)                           |
| 100–150 minutes                                        | 179 (9.7%)                    | 0 (0.0%)                   | 508 (39.8%)                        | 190 (11.9%)                  | 0 (0.0%)                            |
| 150–180 minutes                                        | 305 (16.6%)                   | 0 (0.0%)                   | 316 (24.7%)                        | 49 (3.1%)                    | 0 (0.0%)                            |
| More than 180 minutes                                  | 1353 (73.7%)                  | 0 (0.0%)                   | 310 (24.3%)                        | 10 (0.6%)                    | 0 (0.0%)                            |

Data are presented as median(IQR) or N(%) unless otherwise indicated, and shown for non-imputed data. Missing data was low (<3%, except for worries about coronacrisis (4.3%) and occupational status (9.1%). IQR = Interquartile Range, SD = Standard Deviation, CES-D = Center for Epidemiologic Studies Depression, HADS = Hospital Anxiety and Depression scale.

**Supplemental Table S3.** Multivariate adjusted associations of potential determinants for the ‘increasers’ trajectory.

|                                                   | ‘Steadily Low’<br>(N = 1590) | ‘Increases’<br>(N = 287) |
|---------------------------------------------------|------------------------------|--------------------------|
|                                                   |                              | OR (95%CI)               |
| <b>Demographics</b>                               |                              |                          |
| Sex (ref = male)                                  |                              |                          |
| Female                                            | ref                          | 0.79 (0.60–1.03)         |
| Age (per 10 years)                                | ref                          | 0.62 (0.51–0.75) *       |
| Educational level (ref = higher)                  |                              |                          |
| Primary                                           | ref                          | 0.97 (0.57–1.65)         |
| Lower                                             | ref                          | 0.62 (0.44–0.88) *       |
| Further/intermediate                              | ref                          | 0.76 (0.55–1.04)         |
| Occupational status (ref = employed)              |                              |                          |
| Unemployed                                        | ref                          | 1.56 (0.84–2.91)         |
| Retired                                           | ref                          | 1.50 (0.96–2.36)         |
| <b>Physical health</b>                            |                              |                          |
| Self-perceived health (ref = very good/excellent) | ref                          | 0.50 (0.30–0.84) *       |
| Poor/fair                                         | ref                          | 0.83 (0.61–1.13)         |
| Good                                              |                              |                          |
| <b>Psychosocial health</b>                        |                              |                          |
| Depressive symptoms                               | ref                          | 0.98 (0.94–1.03)         |
| Anxiety symptoms                                  | ref                          | 1.00 (0.94–1.07)         |
| Worries about the pandemic (scale 0–10)           | ref                          | 1.04 (0.97–1.10)         |
| <b>Lifestyle</b>                                  |                              |                          |
| Diet compared to prior (ref = as healthy)         |                              |                          |
| (Much) less healthy                               | ref                          | 1.05 (0.60–1.83)         |
| (Much) more healthy                               | ref                          | 1.07 (0.67–1.72)         |
| Smoking                                           | ref                          | 0.79 (0.51–1.23)         |
| Alcohol (glass/day)                               | ref                          | 1.07 (0.97–1.19)         |

OR = Odds Ratio, CI = Confidence Interval, ref = reference, CES-D = Center for Epidemiologic Studies Depression, HADS = Hospital Anxiety and Depression scale.
